# Supplementary material for: Dual roles of 3-aminopropyltriethoxysilane in preparing molecularly imprinted silica particles for specific recognition of target molecules
Source: Royal Society of Chemistry journal article supplement (doi:10.1039/d0ra01684e), 2020-01-01
Supplement: d0ra01684e1.pdf [file d0ra01684e1.pdf]

## Electronic Supplementary Information

*for*

### **Dual roles of 3-aminopropyltriethoxysilane in preparing molecularly imprinted silica particles for specific recognition of target molecule**

Fenyng Wang,<sup>\*a</sup> Baoping Ling,<sup>b</sup> Qianjin Li <sup>\*c</sup> and Rahma Abouhany <sup>d</sup>

<sup>a</sup> College of Chemistry, Nanchang University, Nanchang, Jiangxi 330031, China

<sup>b</sup> School of Chemistry and Chemical Engineering, Qufu Normal University, Qufu,  
Shandong 273165, China

<sup>c</sup> Department of Food Science and Engineering, School of Food Science and  
Pharmaceutical Engineering, Nanjing Normal University, Nanjing 210023, China

<sup>d</sup> Department of Biomedical Sciences, Faculty of Health and Society, Malmö  
University, Malmö 20506, Sweden

Corresponding authors:

Fenyng Wang (wangfenying@ncu.edu.cn);

Qianjin Li (liqianjinnju@163.com).

**Table S1.** Imprinting factor of the MIPs.

| Polymer Name | Imprinting factor (IF) |          |
|--------------|------------------------|----------|
|              | In ethanol             | In water |
| MIP1         | 32.2                   | 15.2     |
| MIP2         | 4.8                    | 3.5      |
| MIP-NH3      | 2.1                    | 2.4      |
| MIP-NaOH     | 0.7                    | 0.8      |

Imprinting factor (IF) was calculated by template amount bound on MIP dividing that bound on NIP.

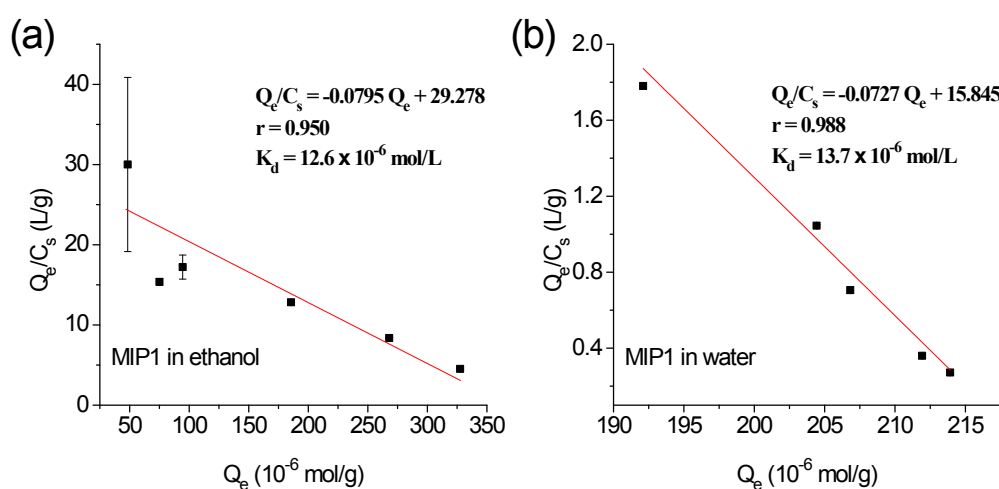

**Fig. S1.** Dissociation constant ( $K_d$ ) of MIP1 to NPA in ethanol (a) and water (b).  $Q_e$  is the amount of the molecule bound to the polymer;  $C_s$  is the free molecule concentration after binding experiments.

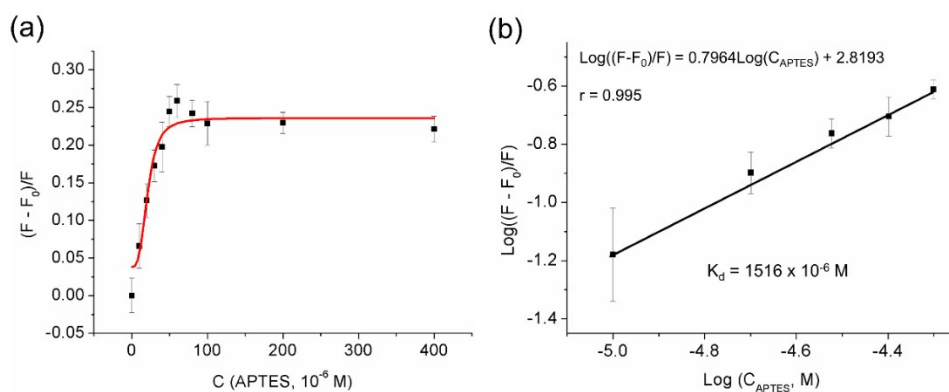

**Fig. S2.** Dose fluorescence response of NPA (50  $\mu\text{M}$ ) to different APTES concentrations (a), and dissociation constant ( $K_d$ ) between APTES and NPA in ethanol (b). The fluorescence intensity ( $F$ ) was measured at 330 nm using an excitation wavelength of 280 nm.  $F_0$  means the fluorescence intensity measured in the absence of the test compound.

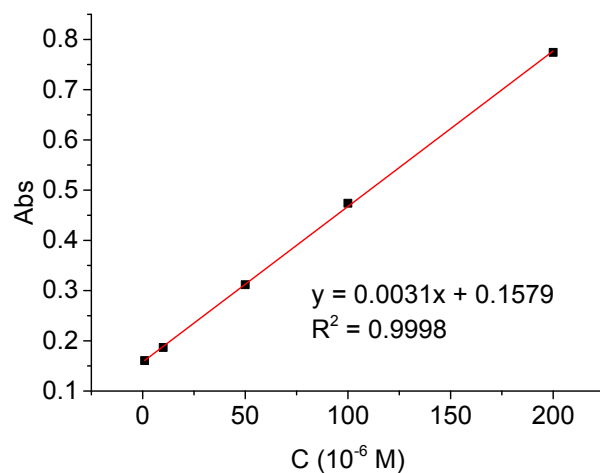

**Fig. S3.** Linear relationship of the NPA concentration in water to its UV absorbance

**Table S2.** Recycle rate of the desorbed NPA from the MIP-based SPE column

| Repeating time | Washing step | V, $\mu\text{L}$ | Abs   | C, $\mu\text{M}$ | NPA, nmol | Recycle rate, % |
|----------------|--------------|------------------|-------|------------------|-----------|-----------------|
| First          | (1)          | 400              | 0.311 | 49               | 20        | 49              |
|                | (2)          | 400              | 0.260 | 33               | 13        | 33              |
|                | (3)          | 400              | 0.217 | 19               | 8         | 19              |
|                | SUM          | /                | /     | /                | 40        | <b>101</b>      |
| Second         | (1)          | 400              | 0.321 | 53               | 21        | 53              |
|                | (2)          | 400              | 0.253 | 31               | 12        | 31              |
|                | (3)          | 400              | 0.205 | 15               | 6         | 15              |
|                | SUM          | /                | /     | /                | 39        | <b>98</b>       |
| Third          | (1)          | 400              | 0.324 | 54               | 21        | 54              |
|                | (2)          | 400              | 0.268 | 36               | 14        | 36              |
|                | (3)          | 400              | 0.198 | 13               | 5         | 13              |
|                | SUM          | /                | /     | /                | 41        | <b>102</b>      |
